# Supplementary material for: Analysis of the prognostic role and biological characteristics of circulating tumor cell-associated white blood cell clusters in non-small cell lung cancer
Source: PubMed Central journal article supplement — J Thorac Dis. 2022 May;14(5):1544–55. doi: 10.21037/jtd-22-423 (PMC9186234; doi:10.21037/jtd-22-423), 2022-05
Supplement: jtd-14-05-1544-dss.pdf [file jtd-14-05-1544-dss.pdf]

## Data Sharing Statement

|                     |                                                                                                                                                     |                                                                                                                  |
|---------------------|-----------------------------------------------------------------------------------------------------------------------------------------------------|------------------------------------------------------------------------------------------------------------------|
| <b>Article Info</b> | <a href="https://dx.doi.org/10.21037/jtd-22-423">https://dx.doi.org/10.21037/jtd-22-423</a>                                                         |                                                                                                                  |
| <b>Item</b>         | <b>Question</b>                                                                                                                                     | <b>Authors' Response<br/>(place "-" if not applicable)</b>                                                       |
| 1                   | Would you like to share data collected for your study to others?                                                                                    | Yes.                                                                                                             |
| 2                   | If not, would you like to share the reason for your decision?                                                                                       | -                                                                                                                |
| 3                   | What data in particular will be shared?                                                                                                             | The survival data in particular will be shared.                                                                  |
| 4                   | Any other documents will be shared? Such as study protocol, statistical analysis plan, informed consent form, clinical study report, analytic code. | Statistical analysis plan, informed consent form, clinical study report will also be shared if requested.        |
| 5                   | When will data availability begin?                                                                                                                  | From the publication date.                                                                                       |
| 6                   | When will data availability end?                                                                                                                    | Two years within the publication date, since the survival data may be updated over time.                         |
| 7                   | To whom will you share the data?                                                                                                                    | Medical oncologists or thoracic surgeons who have research in the CTC field.                                     |
| 8                   | For what type of analysis or purpose?                                                                                                               | To analyze the prognostic value of CTC-WBC clusters in advanced NSCLC.                                           |
| 9                   | How or where can the data/documents be obtained?                                                                                                    | Emails could be sent to the address below to obtain the shared data: lizheng3698@163.com.                        |
| 10                  | Any other restrictions?                                                                                                                             | We may balance the potential benefits and risks for each request and then provide the data that could be shared. |
